# Supplementary material for: A Genome-Wide Analysis and Expression Profile of Heat Shock Transcription Factor (Hsf) Gene Family in Rhododendron simsii
Source: MDPI journal article supplement (doi:10.3390/plants12223917), 2023-11-20
Supplement: s1 [file s1]

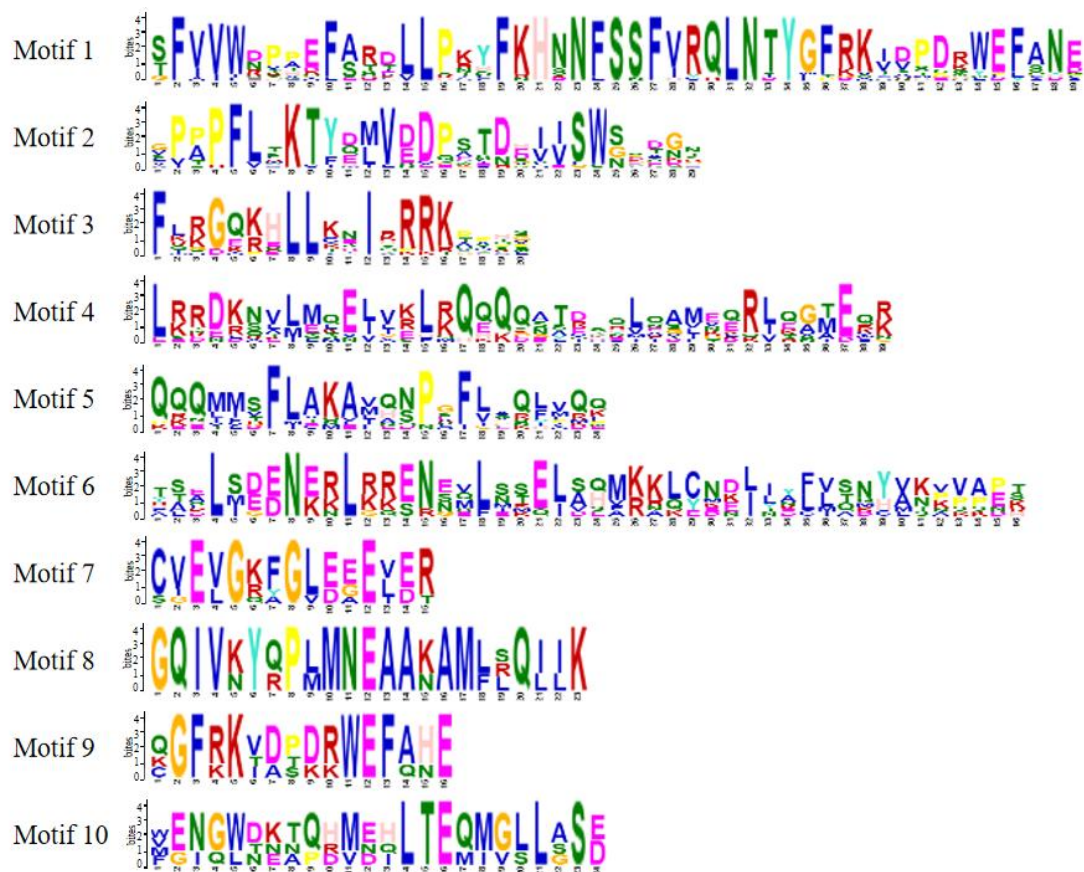

**Figure S1.** The specific sequence information of 10 motifs. The letters represent amino acids, the color does not represent any meaning, which are automatically synthesized by the MEME, and the height of the letters represents the motifs conservation.

**Table S1.** Primers of the RsHsfs for qRT-PCR

| Primer        | Sequence             |
|---------------|----------------------|
| qRT-RsHsf1-F  | ACGGTTTCCGAAAGGTCGAT |
| qRT-RsHsf1-R  | TGACCTTGCTGTGCTTCCTT |
| qRT-RsHsf12-F | GCTTTCGGAGGACAACGAGA |
| qRT-RsHsf12-R | AGGCGGCGGCAAATTAGATA |
| qRT-RsHsf13-F | CTTCCACTGCCTTCATCCGT |
| qRT-RsHsf13-R | TGGAGGGCAATAGACGATGC |
| qRT-RsHsf15-F | TACAACACCACCACCACCAC |
| qRT-RsHsf15-R | GTTTCCTCATGTGCGCGATT |
| qRT-RsHsf16-F | TCAAGCGAGGACAACGAGAG |
| qRT-RsHsf16-R | TCGGCGTTCTTGATGGTAG  |
| qRT-RsHsf17-F | GGCTATGCAAAGTCCTGGGT |
| qRT-RsHsf17-R | ATTGGCGGCTGATACCTCAC |
| qRT-RsHsf18-F | CCGCAACGATGATTCCAACC |
| qRT-RsHsf18-R | CACGTTCCAGACAGCAAAGC |
| qRT-RsHsf19-F | AGGGAGCTCCTCACACAGAT |
| qRT-RsHsf19-R | GGCGTTCTTCGAGTCTAGCA |
| qRT-RsHsf21-F | GAGGGCAGAAACACCTCCTG |
| qRT-RsHsf21-R | TTCTGCTGGTGCTGTCTGAG |
